# Supplementary material
Source: PubMed Central journal article supplement (PMC2856296)
Supplement: supp_M109.077594_jbc.M109.077594-2.pdf [file supp_M109.077594_jbc.M109.077594-2.pdf]

**Supplementary Table 1. SM composition of WT and CerS2 null mouse liver.** For details, see Table 1. Statistical analysis was performed for the changes in C16, C22, C24 and C24:1-SM in WT mice as indicated.

| SM acyl chain length ( <i>pmol/mg of tissue</i> ) (WT) |            |                  |           |             |            |                          |                        |                         |           |           |
|--------------------------------------------------------|------------|------------------|-----------|-------------|------------|--------------------------|------------------------|-------------------------|-----------|-----------|
|                                                        | C14        | C16 <sup>a</sup> | C18:1     | C18         | C20        | C22                      | C24:1                  | C24                     | C26:1     | C26       |
| Age<br>(days)                                          |            |                  |           |             |            |                          |                        |                         |           |           |
| 0                                                      | 6.7 ± 1.9  | 617 ± 127        | 8.4 ± 2.4 | 84.3 ± 17.0 | 27.6 ± 5.5 | 99.4 ± 19.0 <sup>b</sup> | 191 ± 44               | 114 ± 23                | 2.4 ± 0.4 | 1.6 ± 0.3 |
| 7                                                      | 12.9 ± 0.3 | 575 ± 108        | 4.6 ± 0.9 | 37.9 ± 4.8  | 12.2 ± 4.4 | 25.0 ± 6.9 <sup>c</sup>  | 224 ± 72               | 84.1 ± 19.2             | 2.0 ± 0.3 | 1.8 ± 0.5 |
| 14                                                     | 8.9 ± 1.5  | 300 ± 58         | 7.0 ± 1.6 | 54.9 ± 10.4 | 13.9 ± 2.0 | 34.3 ± 2.8 <sup>d</sup>  | 194 ± 24               | 89.3 ± 8.6 <sup>j</sup> | 1.9 ± 0.0 | 2.9 ± 0.3 |
| 21                                                     | 6.6 ± 2.3  | 318 ± 281        | 5.8 ± 0.4 | 68.1 ± 8.0  | 23.1 ± 0.4 | 68.5 ± 12.5 <sup>e</sup> | 297 ± 84 <sup>g</sup>  | 127 ± 39 <sup>k</sup>   | 2.1 ± 0.7 | 3.7 ± 1.4 |
| 30                                                     | 6.9 ± 0.3  | 226 ± 96         | 4.6 ± 1.6 | 46.9 ± 27.3 | 24.0 ± 4.1 | 110.6 ± 7.8 <sup>f</sup> | 317 ± 144 <sup>h</sup> | 126 ± 33                | 1.3 ± 0.6 | 1.0 ± 0.2 |
| 60                                                     | 11.6 ± 1.9 | 170 ± 41         | 2.3       | 27.2 ± 10.4 | 25.5 ± 8.7 | 115.4 ± 33.6             | 288 ± 127 <sup>i</sup> | 149 ± 60                | 1.3 ± 0.6 | 1.5 ± 0.3 |
| 120                                                    | 8.1 ± 1.0  | 132 ± 27         | 2.2 ± 0.1 | 17.9 ± 0.7  | 20.5 ± 2.8 | 121.3 ± 14.2             | 174 ± 16               | 87.0 ± 1.45             | 0.9 ± 0.1 | 1.4 ± 0.5 |

  

| SM acyl chain length ( <i>pmol/mg of tissue</i> ) (CerS2 null) |            |            |           |             |            |            |           |           |            |           |
|----------------------------------------------------------------|------------|------------|-----------|-------------|------------|------------|-----------|-----------|------------|-----------|
|                                                                | C14        | C16        | C18:1     | C18         | C20        | C22        | C24:1     | C24       | C26:1      | C26       |
| Age<br>(days)                                                  |            |            |           |             |            |            |           |           |            |           |
| 0                                                              | 11.1 ± 4.4 | 1265 ± 462 | 6.0 ± 2.3 | 68.1 ± 24.6 | 24.8 ± 8.7 | 14.4 ± 4.9 | 3.4 ± 1.3 | 7.9 ± 2.5 | 0.45 ± 0.2 | 0.4 ± 0.1 |
| 7                                                              | 9.4 ± 0.6  | 675 ± 26   | 1.8 ± 0.0 | 9.6 ± 0.9   | 4.7 ± 0.5  | 3.6 ± 0.5  | 1.0 ± 0.3 | 2.1 ± 0.4 | 0.2 ± 0.0  | 0.1 ± 0.0 |
| 14                                                             | 11.6 ± 0.3 | 763 ± 41   | 6.1 ± 0.1 | 24.6 ± 3.7  | 10.4 ± 0.7 | 6.2 ± 0.1  | 1.9 ± 0.8 | 2.9 ± 0.4 | 0.3 ± 0.2  | 0.2 ± 0.1 |
| 21                                                             | 11.6 ± 3.3 | 1168 ± 281 | 4.0 ± 2.2 | 33.2 ± 9.6  | 16.3 ± 4.3 | 11.8 ± 2.6 | 2.2 ± 0.4 | 5.1 ± 0.6 | 0.1 ± 0.0  | 0.2 ± 0.0 |

|     |           |           |            |             |             |             |             |            |           |           |
|-----|-----------|-----------|------------|-------------|-------------|-------------|-------------|------------|-----------|-----------|
| 30  | 7.7 ± 1.4 | 773 ± 53  | 12.1 ± 1.6 | 46.8 ± 5.7  | 23.7 ± 6.6  | 16.6 ± 2.6  | 1.8 ± 0.2   | 5.0 ± 0.5  | 0.2 ± 0.0 | 0.3 ± 0.0 |
| 60  |           | 930 ± 343 |            | 76.3 ± 41.9 | 43.1 ± 21.9 | 25.6 ± 10.9 | 5.1 ± 2.7   | 9.9 ± 4.8  | 0.2 ± 0.1 | 0.4 ± 0.2 |
| 120 | 4.6 ± 0.1 | 1036 ± 61 | 6.9 ± 0.6  | 49.7 ± 12.9 | 28.2 ± 9.1  | 22.9 ± 0.7  | 19.8 ± 12.8 | 11.3 ± 3.7 | 0.3 ± 0.0 | 0.2 ± 0.0 |

<sup>a</sup> C16-SM levels were significantly reduced after 14, 21, 30, 60 and 120 days compared to day 0 (p < 0.05)

<sup>b</sup> versus <sup>c</sup>, <sup>d</sup> versus <sup>e</sup>, <sup>g</sup> versus <sup>h</sup>, <sup>g</sup> versus <sup>i</sup>, <sup>j</sup> versus <sup>k</sup>, p < 0.05

<sup>e</sup> versus <sup>f</sup>, p < 0.01

**Supplementary Table 2. HexCer composition of WT and CerS2 null mouse livers.** For details, see Table 1. Statistical analysis was performed for the changes in C16, C22, C24 and C24:1-HexCer in WT mice as indicated.

| HexCer acyl chain length ( <i>pmol/mg of tissue</i> ) (WT) |           |                         |           |           |           |                         |                    |                         |           |           |
|------------------------------------------------------------|-----------|-------------------------|-----------|-----------|-----------|-------------------------|--------------------|-------------------------|-----------|-----------|
|                                                            | C14       | C16                     | C18:1     | C18       | C20       | C22                     | C24:1 <sup>g</sup> | C24                     | C26:1     | C26       |
| Age<br>(days)                                              |           |                         |           |           |           |                         |                    |                         |           |           |
| 0                                                          | 0.7 ± 0.2 | 21.3 ± 3.0 <sup>a</sup> | 0.1 ± 0.0 | 3.7 ± 0.2 | 2.1 ± 0.2 | 8.5 ± 0.7 <sup>d</sup>  | 6.8 ± 1.4          | 10.3 ± 0.7              | 0.3 ± 0.1 | 0.1 ± 0.1 |
| 7                                                          | 1.0 ± 0.1 | 43.4 ± 2.1 <sup>b</sup> | 0.0 ± 0.0 | 2.8 ± 0.6 | 0.9 ± 0.3 | 3.6 ± 0.4 <sup>e</sup>  | 11.8 ± 1.7         | 11.3 ± 0.2 <sup>h</sup> | 0.2 ± 0.1 | 0.1 ± 0.0 |
| 14                                                         | 0.6 ± 0.0 | 27.9 ± 3.7 <sup>c</sup> | 0.3 ± 0.0 | 8.2 ± 0.7 | 2.9 ± 0.6 | 11.8 ± 2.0 <sup>f</sup> | 13.3 ± 2.0         | 20.4 ± 2.1 <sup>j</sup> | 0.3 ± 0.0 | 0.3 ± 0.0 |
| 21                                                         | 0.6 ± 0.2 | 24.3 ± 6.7              | 0.5 ± 0.0 | 7.4 ± 1.6 | 4.6 ± 0.8 | 19.4 ± 4.7              | 19.8 ± 2.9         | 22.3 ± 3.1 <sup>i</sup> | 0.3 ± 0.0 | 0.2 ± 0.1 |
| 30                                                         | 0.5 ± 0.0 | 7.9 ± 5.5               | 0.1 ± 0.0 | 3.1 ± 2.8 | 1.9 ± 1.2 | 9.3 ± 4.3               | 10.1 ± 5.8         | 6.3 ± 3.7 <sup>k</sup>  | 0.3 ± 0.0 | 0.2 ± 0.0 |
| 60                                                         | 0.6       | 6.6 ± 3.6               | 0.2       | 1.2 ± 0.8 | 3.0 ± 1.8 | 11.2 ± 6.5              | 6.0 ± 2.6          | 8.0 ± 3.5               | 0.8 ± 0.7 | 0.4 ± 0.3 |
| 120                                                        | 0.6 ± 0.4 | 2.7 ± 0.5               | 0.1 ± 0.1 | 0.5 ± 1.8 | 0.8 ± 0.5 | 7.2 ± 2.7               | 3.5 ± 0.7          | 3.5 ± 1.6               | 0.1 ± 0.1 | 0.1 ± 0.0 |

  

| HexCer acyl chain length ( <i>pmol/mg of tissue</i> ) (CerS2 null) |           |             |           |           |           |           |           |           |           |           |
|--------------------------------------------------------------------|-----------|-------------|-----------|-----------|-----------|-----------|-----------|-----------|-----------|-----------|
|                                                                    | C14       | C16         | C18:1     | C18       | C20       | C22       | C24:1     | C24       | C26:1     | C26       |
| Age<br>(days)                                                      |           |             |           |           |           |           |           |           |           |           |
| 0                                                                  | 0.4 ± 0.0 | 46.4 ± 8.9  | 0.2 ± 0.0 | 1.8 ± 0.5 | 1.5 ± 0.3 | 1.4 ± 0.3 | 0.1 ± 0.1 | 0.6 ± 0.1 | 0.3 ± 0.1 | 0.2 ± 0.1 |
| 7                                                                  | 0.6 ± 0.1 | 46.0 ± 5.9  | 0.0 ± 0.0 | 0.5 ± 0.0 | 0.4 ± 0.0 | 0.4 ± 0.1 | 0.0 ± 0.0 | 0.4 ± 0.1 | 0.1 ± 0.0 | 0.0 ± 0.0 |
| 14                                                                 | 0.6 ± 0.1 | 44.7 ± 1.0  | 0.1 ± 0.0 | 1.3 ± 0.2 | 1.2 ± 0.2 | 1.4 ± 0.1 | 0.0 ± 0.0 | 0.6 ± 0.0 | 0.0 ± 0.0 | 0.1 ± 0.0 |
| 21                                                                 | 0.4 ± 0.1 | 52.0 ± 14.6 | 0.0 ± 0.0 | 1.0 ± 0.4 | 1.3 ± 0.4 | 1.5 ± 0.1 | 0.1 ± 0.0 | 0.7 ± 0.0 | 0.0 ± 0.0 | 0.1 ± 0.0 |

|     |           |             |           |           |           |           |           |           |           |           |
|-----|-----------|-------------|-----------|-----------|-----------|-----------|-----------|-----------|-----------|-----------|
| 30  | 0.5 ± 0.1 | 25.1 ± 2.4  | 0.0 ± 0.0 | 1.2 ± 0.7 | 1.0 ± 0.2 | 1.2 ± 0.1 | 0.1 ± 0.0 | 0.4 ± 0.0 | 0.0 ± 0.0 | 0.0 ± 0.0 |
| 60  | 0.8       | 39.7 ± 21.2 | 0.00      | 1.3 ± 1.0 | 2.9 ± 2.0 | 2.6 ± 0.9 | 0.3 ± 0.1 | 0.7 ± 0.1 | 0.8 ± 0.8 | 0.2 ± 0.0 |
| 120 | 0.4 ± 0.1 | 42.2 ± 13.1 | 0.3 ± 0.0 | 0.9 ± 0.3 | 1.8 ± 1.0 | 2.2 ± 0.9 | 0.2 ± 0.0 | 0.7 ± 0.1 | 0.0       | 0.2 ± 0.2 |

<sup>a</sup> versus <sup>b</sup>, <sup>e</sup> versus <sup>f</sup>, <sup>h</sup> versus <sup>j</sup>, <sup>i</sup> versus <sup>k</sup>, p < 0.05

<sup>b</sup> versus <sup>c</sup>, <sup>d</sup> versus <sup>e</sup>, p < 0.01

<sup>g</sup> C24:1-HexCer levels were significantly elevated after 7, 14, 21 days compared to day 0 (p < 0.05), and significantly reduced on days 60 and 120 compared to days 30 (p < 0.05)
