# Supplementary material
Source: PubMed Central journal article supplement (PMC2856296)

**SUPPLEMENTARY EXPERIMENTAL PROCEDURES**

**PCR methods and primers for genotyping mice**

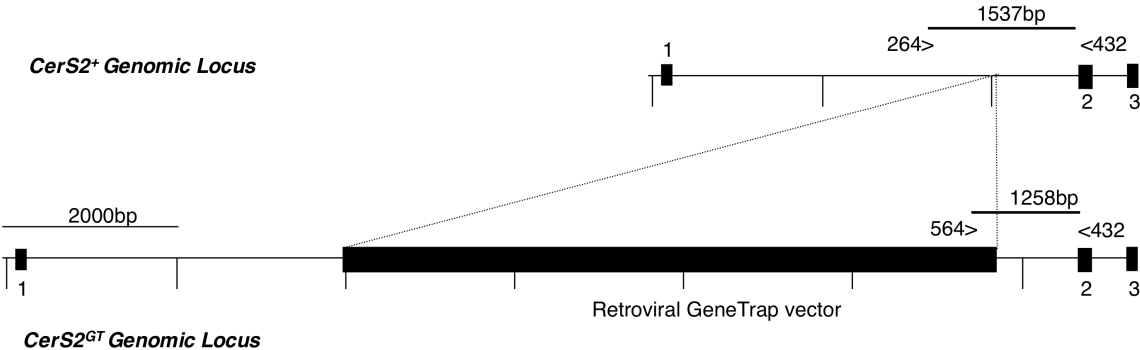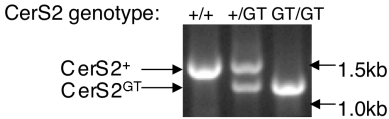

Supplement: supp_M109.077594_jbc.M109.077594-1.pdf [file supp_M109.077594_jbc.M109.077594-1.pdf]
